# Supplementary material for: The Proteomics of Colorectal Cancer: Identification of a Protein Signature Associated with Prognosis
Source: PLOS journal article supplement (doi:10.1371/journal.pone.0027718), 2011-11-18
Supplement: S4 (10.1371/journal.pone.0027718.s004) [file journal.pone.0027718.s004]

**Table S4.** Relationship of survival of individual clusters identified by cluster analysis.

| Cluster number<br>(number of cases) | Number (%) of events | Mean survival (months, 95% CI) | $\chi^2$ | Cluster number |          |              |          |              |          |              |          |              |          |              |          |              |          |              |          |              |          |               |
|-------------------------------------|----------------------|--------------------------------|----------|----------------|----------|--------------|----------|--------------|----------|--------------|----------|--------------|----------|--------------|----------|--------------|----------|--------------|----------|--------------|----------|---------------|
|                                     |                      |                                |          | 1<br>p value   | $\chi^2$ | 2<br>p value | $\chi^2$ | 3<br>p value | $\chi^2$ | 4<br>p value | $\chi^2$ | 5<br>p value | $\chi^2$ | 6<br>p value | $\chi^2$ | 7<br>p value | $\chi^2$ | 8<br>p value | $\chi^2$ | 9<br>p value | $\chi^2$ | 10<br>p value |
| 1 (39)                              | 8 (20.5)             | 159 (135-178)                  |          |                | 7.19     | <b>0.008</b> | 5.74     | <b>0.017</b> | 3.95     | <b>0.047</b> | 7.79     | <b>0.005</b> | 1.69     | 0.193        | 4.49     | <b>0.034</b> | 7.51     | <b>0.006</b> | 3.72     | <b>0.054</b> | 10.2     | <b>0.001</b>  |
| 2 (24)                              | 14 (59.3)            | 95(65-125)                     | 7.13     | <b>0.008</b>   |          |              | 0.62     | 0.430        | 0.15     | 0.699        | 0.12     | 0.734        | 0.53     | 0.466        | 0.39     | 0.531        | 0.05     | 0.821        | 1.04     | 0.308        | 1.97     | 0.160         |
| 3 (78)                              | 36 (47.2)            | 105 (89-122)                   | 5.74     | <b>0.017</b>   | 0.62     | 0.430        |          |              | 0.00     | 0.986        | 0.20     | 0.657        | 0.08     | 0.772        | 0.01     | 0.944        | 0.80     | 0.370        | 0.12     | 0.732        | 2.61     | 0.106         |
| 4 (23)                              | 10 (43.5)            | 100 (70-131)                   | 3.95     | <b>0.047</b>   | 0.15     | 0.699        | 0.00     | 0.986        |          |              | 0.06     | 0.806        | 0.09     | 0.771        | 0.00     | 0.988        | 0.33     | 0.566        | 0.10     | 0.748        | 1.75     | 0.186         |
| 5 (108)                             | 51 (47.2)            | 98 (84-112)                    | 7.79     | <b>0.005</b>   | 0.12     | 0.734        | 0.20     | 0.657        | 0.06     | 0.806        |          |              | 0.18     | 0.670        | 0.04     | 0.840        | 0.31     | 0.575        | 0.62     | 0.431        | 2.08     | 0.149         |
| 6 (12)                              | 5 (41.7)             | 88 (63-112)                    | 1.69     | 0.193          | 0.53     | 0.466        | 0.08     | 0.772        | 0.09     | 0.771        | 0.18     | 0.670        |          |              | 0.04     | 0.836        | 0.76     | 0.382        | 0.00     | 0.998        | 1.86     | 0.173         |
| 7 (36)                              | 16 (44.4)            | 93 (73-113)                    | 4.49     | <b>0.034</b>   | 0.39     | 0.531        | 0.01     | 0.944        | 0.00     | 0.988        | 0.04     | 0.840        | 0.04     | 0.836        |          |              | 0.57     | 0.468        | 0.14     | 0.704        | 1.76     | 0.184         |
| 8 (41)                              | 19 (47.3)            | 89 (63-115)                    | 7.51     | <b>0.006</b>   | 0.05     | 0.821        | 0.80     | 0.370        | 0.33     | 0.566        | 0.31     | 0.575        | 0.76     | 0.382        | 0.57     | 0.468        |          |              | 1.26     | 0.263        | 0.74     | 0.389         |
| 9 (51)                              | 21 (41.2)            | 103 (85-121)                   | 3.72     | <b>0.054</b>   | 1.04     | 0.308        | 0.12     | 0.732        | 0.10     | 0.748        | 0.62     | 0.431        | 0.00     | 0.998        | 0.14     | 0.704        | 1.26     | 0.263        |          |              | 3.06     | 0.080         |
| 10 (19)                             | 11 (58.9)            | 56 (35-76)                     | 10.26    | <b>0.001</b>   | 1.97     | 0.160        | 2.61     | 0.106        | 1.75     | 0.186        | 2.08     | 0.149        | 1.86     | 0.173        | 1.76     | 0.184        | 0.74     | 0.389        | 3.06     | 0.080        |          |               |

Significant values are highlighted in bold.
